# Supplementary material
Source: HighWire-hosted journal article supplement (https://www.cmaj.ca/content/suppl/2020/04/15/cmaj.200305)
Supplement: 200305-ana-fr.pdf [file 200305-ana-fr.pdf]

# Leçons tirées des débuts du dépistage de la COVID-19 au Canada pour se préparer à une pandémie

Molly Lin MD, Alina Beliaevsky MD, Kevin Katz MDCM MSc, Jeff E. Powis MD MSc, Wil Ng MHSc, Victoria Williams MPH, Michelle Science MD MSc, Helen Groves MB BCh BAO PhD, Mathew P. Muller MD PhD, Alon Vaisman MD MAS, Susy Hota MD MSc, Jennie Johnstone MD PhD, Jerome A. Leis MD MSc

■ Citation : *CMAJ* 2020 le 23 mars;192:E314-8. doi : 10.1503/cmaj.200305; diffusion hâtive le 6 mars 2020

Infographie accessible ici : [www.cmaj.ca/lookup/suppl/doi:10.1503/cmaj.200305/-/DC1](http://www.cmaj.ca/lookup/suppl/doi:10.1503/cmaj.200305/-/DC1)

**L**e nouveau coronavirus (maladie à coronavirus 2019 [COVID-19]) qui a fait son apparition à Wuhan, en Chine, en décembre 2019 constitue une menace pour la santé publique à l'échelle internationale. Le 2 mars 2020, on recensait 90 284 cas confirmés dans le monde, soit 80 026 cas (89 %) et 2912 décès en Chine, et 10 258 cas dans 59 autres pays, dont 27 cas confirmés au Canada<sup>1</sup>. Le 21 février, en Ontario seulement, 479 personnes soupçonnées d'être atteintes (PSA) avaient subi un test de dépistage, dont 3 avaient un résultat positif.

Depuis les dernières semaines, l'épidémie de COVID-19 ne montre aucun signe d'essoufflement. Les autorités craignent de plus en plus la perspective d'une pandémie, qui mettrait à rude épreuve les ressources du système de santé canadien. Une analyse descriptive rapide du récent fardeau que représente le dépistage de la COVID-19 pour le système de santé permettrait la mise en évidence des obstacles à surmonter en vue d'élaborer des politiques et des pratiques plus efficaces en matière de prestation de soins dans différents secteurs, provinces et territoires en prévision d'une pandémie.

Nous soumettons une analyse de données sur des PSA s'étant présentées à 1 des 8 services des urgences de Toronto sur une période d'un mois, ainsi que des facteurs pouvant contribuer à l'augmentation des visites à ces services. Cette information pourra servir à orienter l'élaboration de politiques favorisant la gestion adéquate de l'épidémie. Bien que le tableau clinique de la COVID-19 se précise de jour en jour, des études internationales semblent indiquer que la majorité des patients présentent de légers symptômes, ne sont pas gravement malades et n'ont pas à être hospitalisés<sup>2</sup>. Ces renseignements sont corroborés par les données limitées disponibles au Canada et indiquent que de nombreuses visites aux services des urgences pourraient être évitables.

## POINTS CLÉS

- On s'attend à une pandémie de la maladie à coronavirus 2019 (COVID-19), qui provoquera une demande massive de tests de dépistage et un nombre important de patients à traiter.
- La majorité des personnes soupçonnées d'être atteintes sont actuellement évaluées aux services des urgences; elles présentent des symptômes légers, signe que ces visites à l'hôpital pourraient être évitées.
- Les obstacles à l'évaluation et au dépistage de la COVID-19 en dehors des hôpitaux de soins de courte durée contribuent probablement au nombre de visites évitables aux services des urgences.
- Il faut éliminer rapidement ces obstacles afin de réduire au minimum l'engorgement des services des urgences, le nombre de travailleurs de la santé infectés et les risques pour les autres patients gravement malades.

## Que nous ont appris les patients testés pour la COVID-19 jusqu'à maintenant?

Les équipes de prévention et de contrôle des infections (PCI) des hôpitaux de la région du Grand Toronto ont pour mandat de recueillir des données de surveillance sur les maladies infectieuses. Les données à l'étude ont été recueillies de façon prospective du 20 janvier au 19 février 2020 dans 8 hôpitaux et portent sur des cas potentiels de COVID-19. Ces données anonymisées comprenaient la date d'évaluation, les caractéristiques démographiques (âge et sexe), les renseignements cliniques, les facteurs de risque épidémiologique, les résultats des analyses en laboratoire et des radiographies, les résultats des tests de dépistage de la COVID-19 et l'issue de la consultation (hospitalisation ou renvoi à domicile).

L'échantillon se composait de 135 patients testés pour la COVID-19; ceux-ci représentaient 28 % des personnes testées en

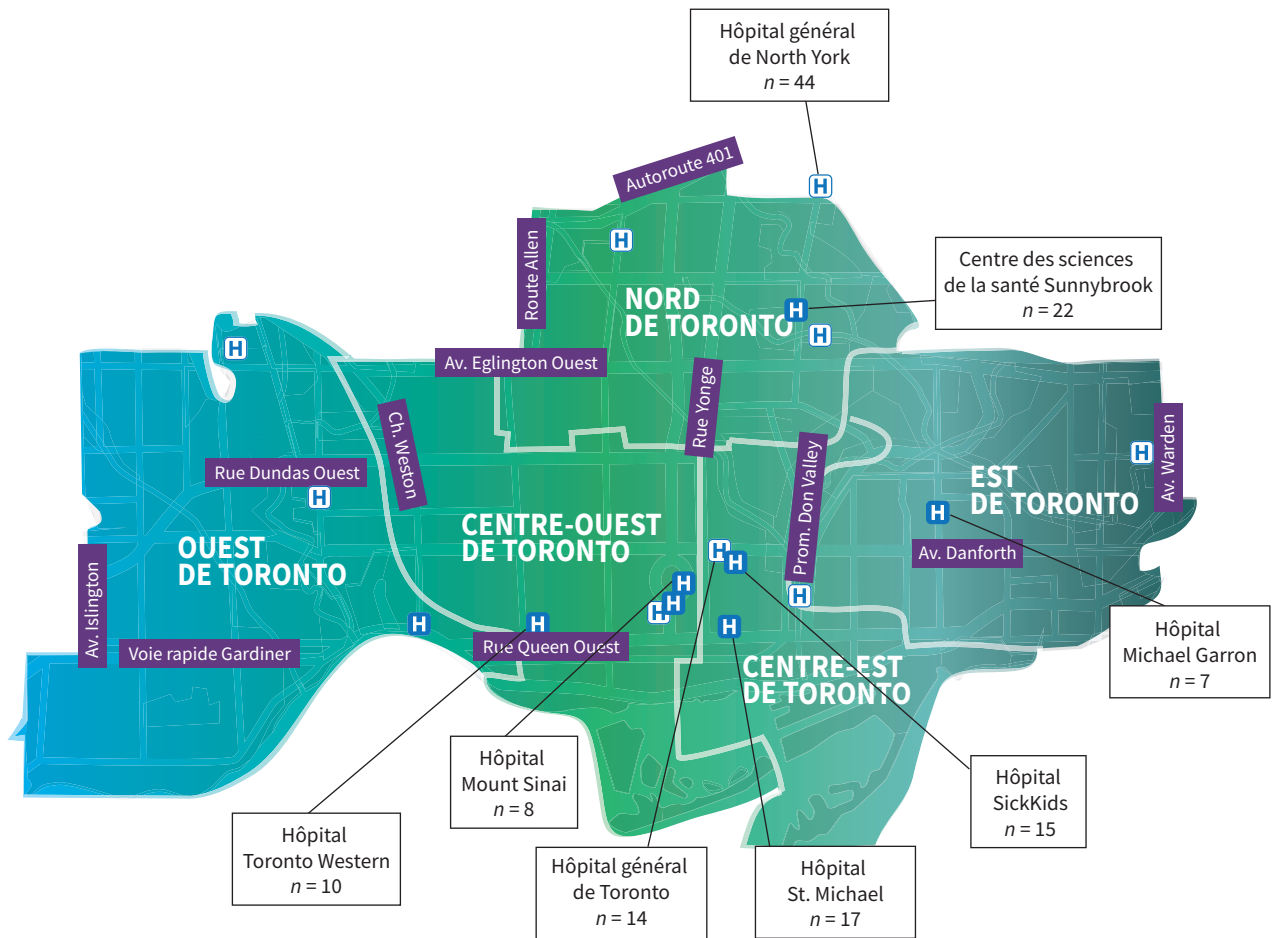

Figure 1 : Distribution des cas à l'étude dans 8 hôpitaux de Toronto ( $n = 135$ ). Image modifiée avec la permission du Réseau local d'intégration des services de santé du Centre-Toronto.

Ontario au cours de la période visée. La figure 1 présente leur distribution au sein du réseau hospitalier torontois. Les caractéristiques des patients sont détaillées dans le tableau 1. L'âge médian était de 28 ans (écart interquartile : 23 à 49; étendue : < 1 à 88), et 95% des patients qui se sont présentés aux services des urgences n'ont pas eu besoin de soins médicaux d'urgence. Les symptômes les plus courants étaient la toux ou l'essoufflement (82%), une fièvre subjective ou une température mesurée de 38,0°C ou plus (48%) et le mal de gorge (30%). Seuls 3 patients (2%) ont dû recevoir de l'oxygène d'appoint durant leur visite aux services des urgences, et 5% des patients seulement ont été hospitalisés, alors que tous les autres sont retournés à la maison en isolement dans l'attente des résultats du test de dépistage, sous la supervision des instances de santé publique régionales.

Au total, 111 patients testés pour la COVID-19 (82%) correspondaient à la définition officielle de PSA établie par les autorités provinciales le 7 février 2020, soit une personne présentant de la fièvre, l'apparition d'une toux ou de difficultés respiratoires et l'un des critères d'exposition dans les 14 jours précédant le début de la maladie (voyage en Chine continentale, contact étroit avec un cas confirmé ou probable de COVID-19 ou contact étroit avec une personne atteinte d'une maladie respiratoire aiguë après un voyage en

Chine continentale)<sup>3</sup>. Dans un contexte où les pratiques de surveillance évoluaient constamment, 8% des personnes testées dans les hôpitaux torontois étaient de retour d'un autre pays que la Chine, et plusieurs pays avaient rapporté des cas de COVID-19 sans lien avec un voyage en sol chinois<sup>4</sup>. En outre, 10% de plus ont été testées bien qu'elles n'aient ni voyagé hors du Canada ni été en contact étroit avec une personne identifiée comme cas probable ou avéré d'infection à la COVID-19, ce qui suggère que certaines personnes recherchaient l'assurance de ne pas avoir contracté la maladie. Dans 2 des 8 hôpitaux, 74 autres patients ont été évalués comme de possibles PSA durant cette période, mais n'ont pas été testés puisqu'elles ne répondaient pas aux critères de la définition de cas. Ainsi, selon les estimations, le nombre total de visites aux services des urgences des hôpitaux torontois pour l'évaluation de PSA excéderait d'au moins 40% le nombre déclaré.

Chez les 135 patients inclus dans l'analyse, les distributions d'âges et de sexes étaient comparables à celles des données sur les PSA récemment présentées aux États-Unis<sup>4</sup>. Comparativement à la plus importante étude de série de cas confirmés de COVID-19 en Chine, où l'âge médian était de loin supérieur (56 ans), les signes et symptômes et le taux d'hospitalisation (5%) étaient similaires à ceux des PSA évaluées dans les hôpitaux torontois<sup>5</sup>.

**Tableau 1 : Caractéristiques de 135 patients évalués et testés pour la COVID-19 dans 8 services des urgences de Toronto du 20 janvier au 19 février 2020**

| Caractéristique                                                                                                                                                                                 | N <sup>bre</sup> (%) de patients* |
|-------------------------------------------------------------------------------------------------------------------------------------------------------------------------------------------------|-----------------------------------|
| Caractéristiques démographiques                                                                                                                                                                 |                                   |
| Âge (années), médiane (IIQ)                                                                                                                                                                     | 28 (23–49)                        |
| Sexe, hommes                                                                                                                                                                                    | 59 (44)                           |
| Arrivée autonome†                                                                                                                                                                               | 128 (95)                          |
| Caractéristiques cliniques                                                                                                                                                                      |                                   |
| Fièvre subjective ou mesurée ( $\geq 38.0$ °C)                                                                                                                                                  | 65 (48)                           |
| Toux ou essoufflement                                                                                                                                                                           | 111 (82)                          |
| Mal de gorge                                                                                                                                                                                    | 40 (30)                           |
| Symptômes gastro-intestinaux                                                                                                                                                                    | 14 (10)                           |
| Malaise ou fatigue                                                                                                                                                                              | 23 (17)                           |
| Catégories de risque épidémiologique                                                                                                                                                            |                                   |
| Retour de Chine depuis < 14 jours                                                                                                                                                               | 111 (82)                          |
| Contact étroit avec un cas probable ou confirmé de COVID-19                                                                                                                                     | 19 (14)                           |
| Contact étroit avec une personne présentant des symptômes respiratoires de retour de Chine depuis < 14 jours                                                                                    | 9 (7)                             |
| Retour d'un autre pays d'Asie depuis < 14 jours                                                                                                                                                 | 11 (8)                            |
| Besoin d'oxygène d'appoint                                                                                                                                                                      | 3 (2)                             |
| Précautions contre la contamination par contact, par gouttelettes ou par voie aérogène                                                                                                          | 134 (99)                          |
| Résultats d'analyse, médiane (IIQ), n = 48                                                                                                                                                      |                                   |
| Globules blancs, $\times 10^9/L$                                                                                                                                                                | 7.3 (6.1–10.0)                    |
| Neutrophiles, $\times 10^9/L$                                                                                                                                                                   | 4.3 (3.4–6.4)                     |
| Lymphocytes, $\times 10^9/L$                                                                                                                                                                    | 2.0 (1.1–2.3)                     |
| Plaquettes, $\times 10^9/L$                                                                                                                                                                     | 216 (179–289)                     |
| Résultats de radiographie pulmonaire                                                                                                                                                            |                                   |
| Pneumonie visible                                                                                                                                                                               | 9 (7)                             |
| Absence de pneumonie                                                                                                                                                                            | 61 (45)                           |
| Aucune radiographie effectuée                                                                                                                                                                   | 65 (48)                           |
| Correspondance avec la définition de cas pour une PSA en Ontario <sup>3</sup>                                                                                                                   | 111 (82)                          |
| Cas confirmé de COVID-19                                                                                                                                                                        | 1 (0.7)                           |
| Suivi proposé                                                                                                                                                                                   |                                   |
| Hospitalisation                                                                                                                                                                                 | 7(5)                              |
| Renvoi à domicile avec isolement et suivi par la santé publique                                                                                                                                 | 128 (95)                          |
| Note: COVID-19 = maladie à coronavirus 2019; IIQ = intervalle interquartile.<br>*Sauf mention contraire.<br>†Le transport du patient aux services des urgences ne s'est pas fait par ambulance. |                                   |

## Pourquoi les gens se présentent-ils aux services des urgences pour un cas présumé de COVID-19?

Afin de déterminer s'il est possible de réduire le nombre de visites aux services des urgences liées aux cas potentiels de COVID-19, il faut d'abord comprendre pourquoi les gens s'y rendent.

Premièrement, depuis le 23 janvier 2020, les autorités ontariennes recommandent le port d'un masque N95 choisi lors de l'essai d'ajustement pour l'évaluation des PSA, ainsi que la mise en place de précautions contre la contamination par contact et

par gouttelettes et le placement des PSA dans une chambre d'isolement des infections aéroportées, lorsque cela est possible<sup>6</sup>. Cette recommandation est fondée sur le principe de précaution décrit dans le rapport Campbell<sup>7</sup>, qui s'applique en cas d'incertitude liée au pathogène ou au mode de transmission. En temps normal, l'équipement de protection individuelle (EPI) et l'infrastructure de soutien nécessaire à la mise en place des précautions contre la contamination par contact, par gouttelettes ou par voie aérogène recommandés par la province sont indisponibles dans la plupart des cliniques de consultation externe, ce

qui empêche l'évaluation et le dépistage des PSA ayant un problème de santé de faible gravité dans ces milieux<sup>3</sup>. La mise en place des précautions recommandées varie d'une région à l'autre, au Canada comme ailleurs. À ce jour cependant, l'Organisation mondiale de la Santé (OMS) ne dispose d'aucune preuve de propagation par voie aérogène, et limite par conséquent ses recommandations à la mise en place de précautions contre la contamination par contact et par gouttelettes, à moins qu'une intervention médicale générant des aérosols soit effectuée<sup>8,9</sup>.

Deuxièmement, l'accès aux tests de dépistage de la COVID-19 en dehors des hôpitaux de soins de courte durée est limité, bien qu'il s'agisse d'une période où le dépistage chez les PSA est essentiel à l'identification des cas pour des raisons de santé publique. Le manque de préparation et d'équipement des fournisseurs de soins primaires pour l'écouvillonnage du nasopharynx ou du cornet moyen fait obstacle puisque, dans les années précédentes, cette pratique était découragée en lien avec d'autres infections respiratoires virales, dont l'influenza<sup>10</sup>.

Troisièmement, en règle générale, les fournisseurs de soins en milieu communautaire ne disposent pas des mêmes ressources et experts en PCI que les hôpitaux de soins de courte durée, y compris du matériel d'écouvillonnage du nasopharynx facilement accessible et l'EPI adéquat. L'incertitude entourant le nouveau pathogène et les directives provinciales décrites précédemment semblent avoir mené les fournisseurs de soins et les autorités de santé publique à diriger les patients vers les services des urgences plus souvent qu'ils le feraient normalement pour d'autres infections respiratoires virales.

Enfin, il est possible que la précédente épidémie du syndrome respiratoire aigu sévère (SRAS) au Canada ait contribué au foisonnement des visites aux services des urgences. En effet, beaucoup de patients pourraient tenir pour acquis que ces services hospitaliers sont l'endroit tout désigné pour le dépistage de la COVID-19<sup>11</sup>.

Il importe de rappeler la nature spéculative de ces facteurs systémiques; d'autres études seront nécessaires pour en confirmer la validité.

## Pourquoi faut-il réduire au minimum les visites de dépistage aux services des urgences?

Des données récentes issues de Wuhan, en Chine, indiquent des taux de transmission élevés de la COVID-19 aux travailleurs de la santé (29% dans une série). Ces taux dépassent ceux observés pour le syndrome respiratoire du Moyen-Orient (SRMO) et le SRAS (18,6% et 21%, respectivement) et mettent en évidence le besoin pressant d'isoler les patients aux symptômes légers qui n'ont pas besoin de soins d'urgence et de réduire les expositions évitables pour le personnel hospitalier et les autres patients<sup>5,12,13</sup>. Les systèmes préconisant l'évaluation de presque tous les patients aux services des urgences provoqueront une poussée virale durant une pandémie de COVID-19. Les services des urgences des 8 hôpitaux torontois comptent de 2 à 16 chambres d'isolement des infections aéroportées qui doivent être réservées pour les interventions médicales générant des aérosols. Dans les circonstances, l'engorgement des services des urgences par des patients assez stables pour éviter l'hospitalisa-

tion provoquera une surpopulation des corridors, ce qui augmentera les risques d'exposition et de transmission et compromettra l'accès des patients atteints de complications de la COVID-19 ou d'une autre maladie aiguë.

## Comment réduire les visites aux services des urgences chez les cas potentiels de COVID-19?

Les recommandations sur l'utilisation de l'EPI en milieu communautaire doivent être fondées sur des données probantes et communiquées clairement à l'ensemble des travailleurs de la santé; les recommandations de l'OMS aux établissements de soins de santé constituent un bon point de départ<sup>14</sup>. D'après la majorité des données disponibles, la mise en place de précautions contre la contamination par contact et par gouttelettes suffit si aucune intervention médicale générant des aérosols n'est requise<sup>9,15,16</sup>.

En effet, ces précautions permettraient aux cliniques de consultation externe de prendre en charge les PSA en minimisant leur risque et de les renvoyer chez eux en isolement sous la supervision des autorités de santé publique régionales. Dans les cas où l'hospitalisation est inutile, cette approche empêcherait la surpopulation des services des urgences et restreindrait au minimum les expositions. En donnant aux médecins de premier recours les moyens de recueillir les spécimens et de les acheminer aux laboratoires de santé publique, ou en mettant sur pied des cliniques de dépistage dans les régions à risque élevé, on indique clairement à la population qu'il faut se rendre directement dans ces sites plutôt qu'aux services des urgences.

Le dépistage à domicile des PSA peut servir de complément au renforcement de la capacité des cliniques de consultation externe. Un projet pilote a d'ailleurs montré qu'il permet de réduire les transports par ambulance et les visites à l'hôpital inutiles<sup>17,18</sup>. Ce système, déjà employé pour d'autres maladies transmissibles, dont la tuberculose, est probablement sous-utilisé pour les PSA présentant de légers symptômes de COVID-19<sup>19</sup>. Les services de Télé-santé Ontario, une solution éprouvée pour la détection des éclo-sions de maladies infectieuses gastro-intestinales en Ontario, pourraient également contribuer à l'identification rapide des PSA et à la transmission de directives aux patients dans la communauté sans passer par les services des urgences<sup>20</sup>.

Au Canada, l'infrastructure de santé publique a connu une évolution considérable depuis l'épidémie de SRAS de 2003; elle est notamment mieux outillée pour répondre efficacement aux épidémies<sup>21</sup>. La santé publique continue de jouer un rôle déterminant dans le suivi étroit et l'isolement des PSA et des cas confirmés, ainsi que dans la recherche de contacts et la surveillance active<sup>22</sup>. Elle est également une référence en matière de communication efficace et d'émission de directives au public, en particulier sur l'utilisation adéquate des services médicaux d'urgence et les consultations en milieu communautaire.

## Conclusion

L'épidémie de COVID-19 évolue rapidement, et une pandémie semble à nos portes. Les préparatifs du Canada doivent dépasser le cadre hospitalier puisqu'une poussée de cas semble inévitable. Les premières expériences de 8 établissements de Toronto montrent

que 95% des PSA ne seront pas gravement malades et n'auront pas à être hospitalisées. Il est possible que les visites inutiles à l'hôpital découlent de l'accès restreint à l'EPI et au matériel de dépistage recommandés, de l'incertitude quant au rôle des fournisseurs de soins de santé en milieu communautaire et du manque de coordination entre ces derniers et les autorités régionales de santé publique. Il faut remédier à ces obstacles immédiatement, avant qu'une pandémie provoque une pression énorme sur les services des urgences au pays, avec pour conséquences l'engorgement des services des urgences, l'infection des travailleurs de la santé et des risques accrus pour les patients atteints d'autres maladies aiguës.

## Références

1. Coronavirus COVID-19 global cases by Johns Hopkins CSSE. Baltimore: Johns Hopkins University. Accessible ici : <https://gisanddata.maps.arcgis.com/apps/opsdashboard/index.html#/bda7594740fd40299423467b48e9ecf6> (consulté le 21 février 2020).
2. Novel Coronavirus Pneumonia Emergency Response Epidemiology Team. The epidemiological characteristics of an outbreak of 2019 novel coronavirus diseases (COVID-19) [article en version chinoise]. *Zhonghua Liu Xing Bing Xue Za Zhi* 2020;41:145-51. 10.3760/cma.j.issn.0254-6450.2020.02.003.
3. COVID-19: guidance for the health sector; Toronto: Ministry of Health and Long-Term Care; modifié le 28 février 2020. Accessible ici : [www.health.gov.on.ca/en/pro/programs/publichealth/coronavirus/2019\\_guidance.aspx](http://www.health.gov.on.ca/en/pro/programs/publichealth/coronavirus/2019_guidance.aspx) (consulté le 21 février 2020).
4. Bajema KL, Oster AM, McGovern OL, et al.; 2019-nCoV Persons Under Investigation Team; 2019-CoV Persons Under Investigation Team. Persons evaluated for 2019 novel coronavirus — United States, January 2020. *MMWR Morb Mortal Wkly Rep* 2020;69:166-70.
5. Wang D, Hu B, Hu C, et al. Clinical characteristics of 138 hospitalized patients with 2019 novel coronavirus-infected pneumonia in Wuhan, China. *JAMA* 2020 le 7 février [Cyberpublication avant impression]. doi: 10.1001/jama.2020.1585.
6. January 23, 2020 letter from CMOH Dr. Barbara Yaffe. Toronto: Ontario Hospital Association; le 23 janvier 2020. Accessible ici : [www.oha.com/Bulletins/ACMOH%20letter%202020-01-23.pdf](http://www.oha.com/Bulletins/ACMOH%20letter%202020-01-23.pdf) (consulté le 2 mars 2020).
7. The SARS Commission. Toronto: The Archives of Ontario; 2006. Accessible ici : [www.archives.gov.on.ca/en/e\\_records/sars/report/index.html](http://www.archives.gov.on.ca/en/e_records/sars/report/index.html) (consulté le 3 février 2020).
8. Novel coronavirus (COVID-19). Vancouver: BC Centre for Disease Control. Accessible ici : [www.bccdc.ca/health-professionals/clinical-resources/novel-coronavirus-\(covid-19\)](http://www.bccdc.ca/health-professionals/clinical-resources/novel-coronavirus-(covid-19)) (consulté le 23 février 2020).
9. Q&A on infection prevention and control for health care workers caring for patients with suspected or confirmed 2019-nCoV. Genève: Organisation mondiale de la Santé; 2020. Accessible ici : [www.who.int/news-room/q-a-detail/q-a-on-infection-prevention-and-control-for-health-care-workers-caring-for-patients-with-suspected-or-confirmed-2019-ncov](http://www.who.int/news-room/q-a-detail/q-a-on-infection-prevention-and-control-for-health-care-workers-caring-for-patients-with-suspected-or-confirmed-2019-ncov) (consulté le 21 février 2020).
10. Test information index: respiratory viruses (including Influenza). Toronto: Public Health Ontario. Accessible ici : [www.publichealthontario.ca/en/laboratory-services/test-information-index/virus-respiratory](http://www.publichealthontario.ca/en/laboratory-services/test-information-index/virus-respiratory) (consulté le 23 février 2020).
11. Peeri NC, Shrestha N, Rahman MS, et al. The SARS, MERS and novel coronavirus (COVID-19) epidemics, the newest and biggest global health threats: What lessons have we learned? *Int. J. Epidemiol* 2020 le 22 février [Cyberpublication avant impression]. doi: 10.1093/ije/dyaa033.
12. Park JE, Jung S, Kim A, et al. MERS transmission and risk factors: a systematic review. *BMC Public Health* 2018;18:574.
13. Malave A, Elamin EM. Severe acute respiratory syndrome (SARS): lessons for future pandemics. *Virtual Mentor* 2010;12:719-25.
14. *The COVID-19 risk communication package for healthcare facilities*. Genève: Organisation mondiale de la Santé; 2020. Accessible ici : <https://iris.wpro.who.int/bitstream/handle/10665.1/14482/COVID-19-022020.pdf> (consulté le 2 mars 2020).
15. *Infection prevention and control during health care when novel coronavirus (nCoV) infection is suspected*. Genève: Organisation mondiale de la Santé; 2020. Accessible ici : [www.who.int/publications-detail/infection-prevention-and-control-during-health-care-when-novel-coronavirus-\(ncov\)-infection-is-suspected-20200125](http://www.who.int/publications-detail/infection-prevention-and-control-during-health-care-when-novel-coronavirus-(ncov)-infection-is-suspected-20200125) (consulté le 23 février 2020).
16. Coronavirus disease (COVID-19): outbreak update. Ottawa: Public Health Agency of Canada. Accessible ici : [www.canada.ca/en/public-health/services/diseases/2019-novel-coronavirus-infection.html](http://www.canada.ca/en/public-health/services/diseases/2019-novel-coronavirus-infection.html) (consulté le 23 février 2020).
17. Mahase E. Coronavirus: home testing pilot launched in London to cut hospital visits and ambulance use. *BMJ* 2020;368:m621.
18. Silversides A. Canada's ability to respond to a national health crisis hampered by jurisdictional issues, untested emergency plans. *CMAJ* 2009;180:1193-4.
19. *Tuberculosis program guideline, 2018*. Toronto: ministère de la Santé et ministère des Soins de longue durée; 2018. Accessible ici : [www.health.gov.on.ca/en/pro/programs/publichealth/oph\\_standards/docs/protocols\\_guidelines/Tuberculosis\\_Program\\_Guideline\\_2018.pdf](http://www.health.gov.on.ca/en/pro/programs/publichealth/oph_standards/docs/protocols_guidelines/Tuberculosis_Program_Guideline_2018.pdf) (consulté le 2 mars 2020).
20. Caudle JM, van Dijk A, Rolland E, et al. Telehealth Ontario detection of gastrointestinal illness outbreaks. *Can J Public Health* 2009;100:253-7.
21. Wu Z, McGoogan JM. Characteristics of and important lessons from the coronavirus disease 2019 (COVID-19) outbreak in China: summary of a report of 72 314 cases from the Chinese Center for Disease Control and Prevention. *JAMA* 2020 le 24 février [Cyberpublication avant impression]. doi: 10.1001/jama.2020.2648.
22. Heymann DL, Shindo N. WHO Scientific and Technical Advisory Group for Infectious Hazards. COVID-19: What is next for public health? *Lancet* 2020;395:542-5.

**Intérêts concurrents :** Jeff Powis a reçu des subventions de recherche de Gilead pour d'autres travaux que la présente étude. Helen Groves a reçu des honoraires pour une présentation sur d'autres travaux que la présente étude lors d'une conférence éducative commanditée par AbbVie. Susy Hota a reçu des subventions de recherche de Finch Therapeutics pour d'autres travaux que la présente étude. Aucun autre intérêt concurrent déclaré.

Cet article a été révisé par des pairs.

**Approbation éthique :** Une demande d'approbation a été soumise aux comités d'éthique de la recherche (CER) des 8 établissements; l'approbation éthique a été octroyée par 3 d'entre eux et accordée automatiquement par les autres établissements.

**Affiliations :** Faculté de médecine (Lin, Beliavsky, Katz, Powis, Muller, Vaisman, Hota, Leis), Université de Toronto; Hôpital général de North York (Katz, Ng), Toronto, Ont.; Hôpital Michael Garron (Powis), East York, Ont.; Centre des sciences de la santé Sunnybrook (Williams, Leis); Hôpital SickKids (Science, Groves); Système de santé Sinai (Johnstone); Départements de pédiatrie (Science, Groves) et de médecine de laboratoire et de pathobiologie (Katz, Johnstone), Université de Toronto; Unity Health Toronto (Muller); Réseau universitaire de santé de Toronto (Vaisman, Hota), Toronto, Ont.

**Collaborateurs :** Molly Lin et Alina Beliavsky ont contribué à l'analyse officielle et à l'ébauche du manuscrit. Jeff Powis, Kevin Katz, Alon Vaisman, Susy Hota, Michelle Science, Helen Groves, Mathew Muller et Jennie Johnstone ont contribué à la gestion des données, à la rédaction et à la révision. Victoria Williams et Wil Ng ont contribué à la gestion des données, au développement de la méthodologie, à la rédaction et à la révision. Jerome Leis a contribué à la conceptualisation, à la gestion des données, à l'organisation de contenus, à l'analyse officielle, à la supervision, à la rédaction et à la révision. Tous les auteurs ont donné leur approbation finale pour la version soumise pour publication et assument l'entière responsabilité de tous les aspects du travail.

**Remerciements :** Les auteurs remercient toutes les équipes de prévention et de contrôles des infections ainsi que les médecins qui participent à la surveillance et au traitement des personnes soupçonnées d'être atteintes de la maladie à coronavirus 2019. Ils remercient également la D<sup>re</sup> Tia Pham d'avoir révisé et commenté une version antérieure du manuscrit.

**Correspondance :** Jerome Leis, [Jerome.Leis@sunnybrook.ca](mailto:Jerome.Leis@sunnybrook.ca)
